# Supplementary material
Source: Springer Nature journal article supplement (https://www.springermedizin.de/resource/supplementary/12936_2007_385_MOESM1_ESM.pdf/9547690)

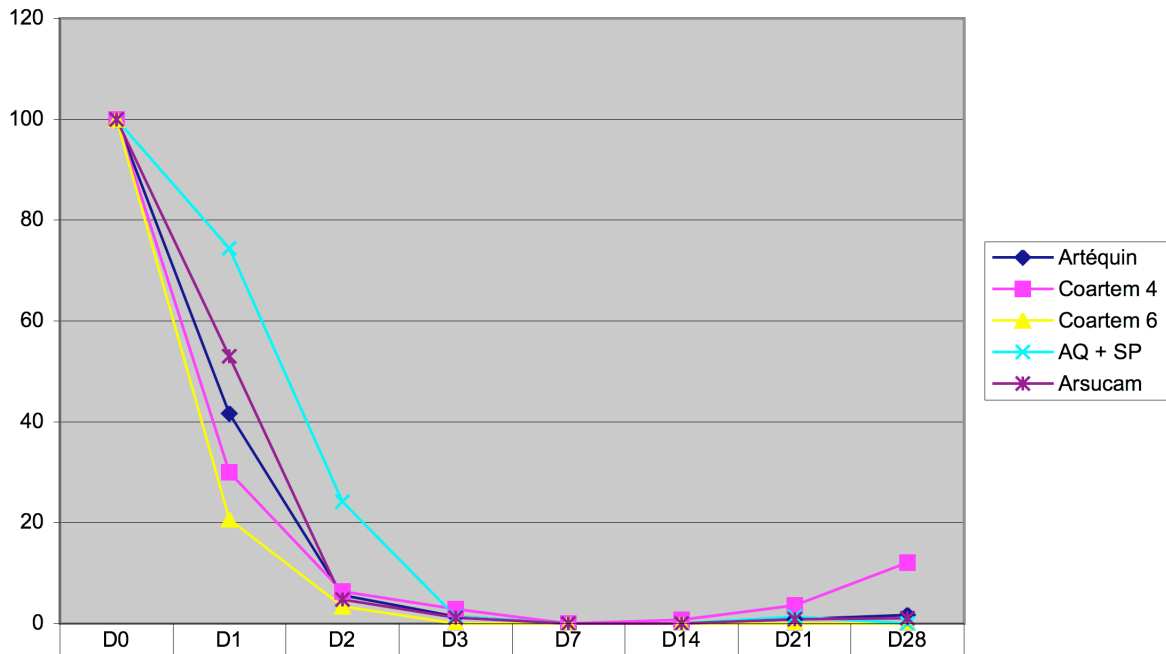

|             |     |      |      |     |   |     |     |      |
|-------------|-----|------|------|-----|---|-----|-----|------|
| ◆ Artéquin  | 100 | 41.7 | 5.6  | 1.4 | 0 | 0   | 0.8 | 1.7  |
| ■ Coartem 4 | 100 | 30   | 6.4  | 2.9 | 0 | 0.7 | 3.6 | 12.1 |
| ▲ Coartem 6 | 100 | 20.7 | 3.4  | 0   | 0 | 0   | 0   | 0    |
| × AQ + SP   | 100 | 74.4 | 24.2 | 1.4 | 0 | 0   | 1.4 | 0    |
| * Arsucam   | 100 | 53   | 4.8  | 1.2 | 0 | 0   | 0.8 | 1.1  |

Supplement: MOESM1 [file 9547690]
